# 1        **The force required to remove tubulin from the microtubule lattice**

2

3    Yin-Wei Kuo<sup>1</sup>, Mohammed Mahamdeh<sup>2,3</sup>, Yazgan Tuna<sup>1</sup>, Jonathon Howard<sup>1\*</sup>

<sup>1</sup>Department of Molecular Biophysics and Biochemistry, Yale University, New Haven Connecticut, USA

<sup>2</sup>Harvard Medical School, Boston, Massachusetts, USA

<sup>3</sup>Cardiovascular Research Center, Massachusetts General Hospital, Boston, Massachusetts, USA

\*Corresponding author: [joe.howard@yale.edu](mailto:joe.howard@yale.edu)

## **Abstract**

Severing enzymes and molecular motors extract tubulin from the walls of microtubules by exerting mechanical force on subunits buried in the lattice. However, how much force is needed to remove tubulin from microtubules is unknown, as is the pathway by which subunits are removed. Using a site-specific functionalization method, we applied forces to the C-terminus of  $\alpha$ -tubulin with an optical tweezer and found that a force of  $\sim 30$  pN is required to extract tubulin from the microtubule wall. Consistent with this force, we show that several kinesins can also extract tubulin. Additionally, we discovered that partial unfolding is an intermediate step in tubulin removal. The unfolding and extraction forces are similar to those generated by AAA-unfoldases, suggesting that severing proteins such as spastin and katanin use an unfoldase mechanism. Our results reveal the response of tubulin to mechanical force and advance our understanding of severing enzymes and microtubule stability.

## 1 Introduction

2 Microtubules serve as tracks for motor proteins and provide mechanical support to  
3 eukaryotic cells <sup>1</sup>. Eukaryotes encode many microtubule-associated proteins that  
4 modulate the dynamics and shapes of the microtubule cytoskeleton to allow cells to move,  
5 divide and change shape <sup>2-5</sup>. Microtubule-severing enzymes (or severases) are AAA-  
6 ATPases that can sever microtubule filaments into shorter pieces using the energy of  
7 ATP-hydrolysis <sup>6</sup>. Recent work has demonstrated that the combination of severases,  
8 dynamic instability, and microtubule end regulators constitute a versatile mechanism to  
9 control the number, length and spatial organization of microtubules <sup>7-11</sup>, accounting for a  
10 wide spectrum of cellular functions that require severing enzymes (reviewed in <sup>12-14</sup>).

11 The current model for microtubule severing proposes that severases pull tubulin  
12 subunits out of the microtubule lattice by exerting mechanical forces on the C-terminal  
13 tails (CTTs) of the tubulin <sup>15</sup>. The microtubule filament is thought to break when enough  
14 tubulin subunits have been removed from the lattice. This model is largely based on  
15 sequence and structural similarity to other AAA+ unfoldases and disaggregases such as  
16 Hsp100 <sup>16,17</sup>, ClpX <sup>18,19</sup> and Vps4 <sup>20,21</sup> that unfold or disassemble proteins (or protein  
17 complexes). By using ATP-hydrolysis, these enzymes produce mechanical forces that  
18 pull proteins through a central channel made by the six AAA domains <sup>22</sup>. Biochemical and  
19 structural studies show that severing enzymes bind tubulin CTTs <sup>23-25</sup>, but experimental  
20 observations of the force generation and tubulin extraction steps are absent.

21 In addition to severing enzymes, molecular motors such as kinesins and dynein  
22 can also remove tubulin subunits from the shafts of microtubules as they walk <sup>26-28</sup>. This  
23 removal of tubulin dimers from the internal lattice is distinct from the well-known activities  
24 of motors removing tubulin from microtubule ends <sup>29</sup>. Bending of microtubules by fluid  
25 flow can also cause dissociation of tubulin subunits from the lattice <sup>30</sup>. Thus, several lines  
26 of evidence suggest that mechanical forces can facilitate the removal of tubulin subunits  
27 from the microtubule shaft <sup>31</sup>. However, direct experimental investigation of the tubulin  
28 extraction process is lacking, due, in part, to the difficulty of applying force to a single  
29 tubulin subunit in a site-specific manner.

1           Here, we address two central questions concerning the tubulin extraction process.  
2           First, how much force is needed to pull out a tubulin subunit? And second, is tubulin  
3           unfolded during the pulling process?  
4

## 5           **Results**

### 6           Development of site-specific labeling method

7           To apply forces to tubulin, we developed a strategy to introduce a functional handle  
8           specific to the C-terminus of  $\alpha$ -tubulin by exploiting the broad substrate tolerance of  
9           tubulin-tyrosine ligase (TTL) reported previously<sup>32,33</sup>. The tubulin CTTs are exposed on  
10           the outer surface of microtubule and are the proposed pulling sites of severing enzymes.  
11           Thus, tubulin CTTs are suitable handles through which to apply mechanical forces. TTL  
12           catalyzes the covalent addition of tyrosine and tyrosine analogs to the C-terminus of  
13           detyrosinated  $\alpha$ -tubulin. We expressed and purified human TTL with an N-terminal His<sub>6</sub>-  
14           SUMO tag (Fig. S1). The tyrosination activity of purified TTL was verified by the increase  
15           of tyrosinated tubulin after incubating TTL with bovine brain tubulin in the presence of  
16           ATP and L-tyrosine (Fig. 1A). We introduced a bioorthogonal azide group to the C-  
17           terminus of  $\alpha$ -tubulin by using 3-azido-tyrosine as the substrate for TTL. The desired  
18           functional molecules containing cycloalkyne were covalently conjugated by strain-  
19           promoted azide-alkyne cycloaddition (SPAAC) (Fig. 1B). To test the labeling specificity,  
20           we first conjugated Alexa Fluor 488 using this site-specific labeling (SSL) method, and  
21           separated  $\alpha$ - and  $\beta$ -tubulin by high-resolution SDS-PAGE. We found that the fluorophore  
22           conjugated with the SSL method is specific to  $\alpha$ -tubulin (Fig. 1C), as previously shown<sup>32</sup>.  
23           We also found that the site-specific fluorophore labeling had little effect on the microtubule  
24           dynamic properties, even at labeling density as high as 43% (Fig. S2A, B). Using SSL-  
25           biotinylated tubulin, we further confirmed that the labeling site is indeed on the C-terminus  
26           of  $\alpha$ -tubulin using tandem mass spectrometry (Fig. S2C). Thus, we have constructed a  
27           site-specific labeling method to covalently conjugate a functional handle to the  $\alpha$ -tubulin  
28           CTT using recombinant TTL and commercially available reagents.  
29

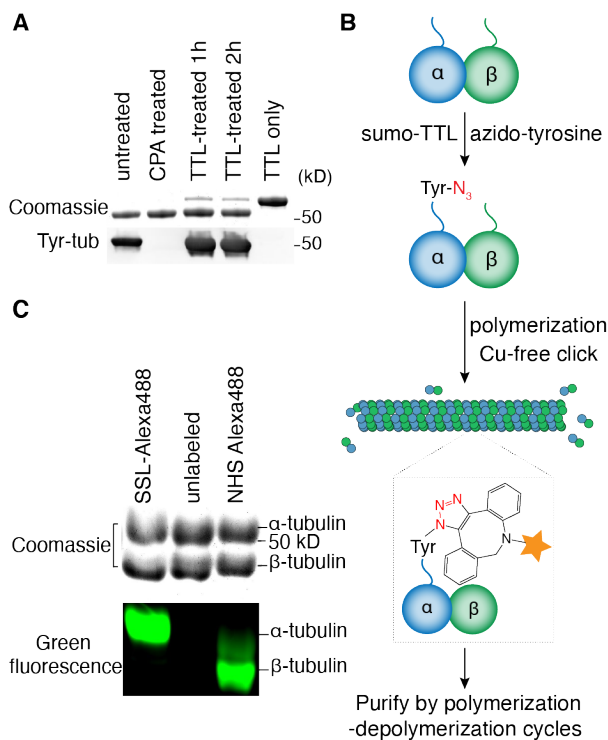

1  
2 **Figure 1. Site-specific functionalization of tubulin.** (A) Recombinant tubulin-tyrosine ligase  
3 (TTL) increased the tyrosination of bovine-brain tubulin. The tyrosinated-tubulin level detected by  
4 anti-tyrosinated tubulin antibody (clone YL1/2) increased after 1 hour of incubation (bottom panel).  
5 Carboxypeptidase A (CPA) cleaves the C-terminal tyrosine of  $\alpha$ -tubulin; CPA-treated tubulin  
6 therefore serves as a negative control. (B) Schematic process of the site-specific labeling and  
7 purification of tubulin. The orange star represents the functional moieties of interest including  
8 fluorophores, affinity tags (e.g., biotin) and macromolecules (e.g., oligo-DNAs). (C) High-  
9 resolution SDS-PAGE of Alexa-Fluor-488-labeled tubulin with either site-specific labeling (SSL)  
10 or non-specific amine-reactive labeling (labeled with NHS ester of Alexa Fluor 488). SSL-tubulin  
11 showed fluorescence signal only on  $\alpha$ -tubulin, while tubulin labeled with NHS ester showed  
12 conjugation on both tubulin chains with a higher fluorescence signal on  $\beta$ -tubulin, potentially due  
13 to the higher reactivity of the  $\beta$ -tubulin lysine side chains.

### 14 15 Pulling tubulin subunits with an optical tweezer

16 We next developed a tubulin-pulling assay using optical tweezers (Fig. 2). Single-  
17 stranded oligo-DNA (a GC-rich 40-mer) was covalently conjugated to the  $\alpha$ -tubulin CTT  
18 with the aforementioned labeling method (Fig. S3A). A long, double-stranded DNA-linker  
19 (8.2 kb, 2.8- $\mu$ m contour length) containing a 5'-flanking region that is complementary to

1 the oligo-DNA handle was then hybridized to the oligo-DNA. The other end of the double-  
2 stranded DNA linkers was labeled with digoxigenin, which was bound to a polystyrene  
3 microsphere coated with anti-digoxigenin antibody. We attached the DNA linkers to taxol-  
4 stabilized microtubules, which was confirmed by total-internal-reflection-fluorescence  
5 (TIRF) microscopy and interference-reflection microscopy (IRM) (Fig. S3B). Taxol-  
6 stabilized microtubules were used because their high stability against depolymerization  
7 is compatible with the low-throughput tweezer experiments; the GDP microtubules used  
8 in the motor experiments described below are susceptible to breakage and spontaneous  
9 depolymerization, making them unsuitable for the tweezer assay. To prevent the  
10 microtubule filaments from bending or sliding when pulled by the optical trap, the  
11 microtubules were copolymerized with biotinylated tubulin. These microtubules were  
12 affixed tightly to the coverslip of a flow-channel coated with neutravidin. Anti-digoxigenin  
13 antibody-coated microspheres were then introduced to form DNA-tethers. The binding of  
14 beads to the DNA linkers was confirmed by their tethered-Brownian motions <sup>34</sup> around  
15 the microtubules.

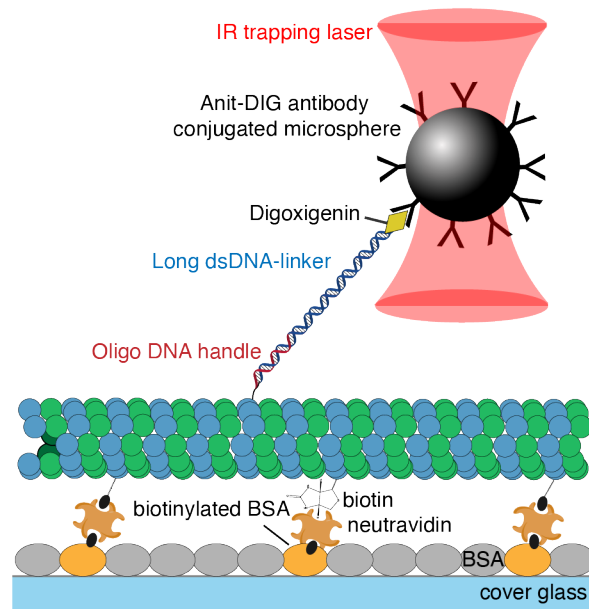

16  
17 **Figure 2. Experimental setup of the tubulin pulling assay using an optical trap.** Tubulin  
18 labeled with an oligo-DNA handle using the SSL method was linked to a long DNA linker through  
19 hybridization. Tubulin conjugated to the DNA-linker was polymerized with biotinylated tubulin and  
20 affixed to the surface of neutravidin-coated coverslips. The anti-digoxigenin antibody-coated

1 microspheres were then bound to the DNA-linker labeled with digoxigenin. Mechanical force was  
2 exerted onto the  $\alpha$ -tubulin CTT by pulling the microsphere with the optical trap.

3  
4 We pulled single tubulin subunits in the lateral direction parallel to the coverslip  
5 surface and perpendicular to the microtubule axis using an optical trap. We chose this  
6 pulling direction mainly to avoid the attachment of more than one DNA linker to the bead  
7 during the pulling experiment. An example of a single-molecule force-extension trace is  
8 shown in Fig. 3A (median-filtered trace in orange). The low-force region of the force-  
9 extension curves corresponds to the stretching of the long double-stranded DNA linkers  
10 and was well described by the worm-like chain model, which included an elasticity term  
11 (Fig. 3A, green curve) <sup>35,36</sup>. We observed both stepwise lengthening and ruptures in the  
12 pulling traces (Fig. 3A, arrows). After the rupture events, the polystyrene microsphere  
13 diffused away after the laser trap was turned off, showing the bead was no longer tethered  
14 to the microtubule. Stepwise-lengthening events were often observed prior to the rupture  
15 (Fig. 3A, 44 out of 48 traces with rupture events). The lengthening events were absent in  
16 control force-extension traces in which DNA-linkers were tethered directly to the surface  
17 (zero out of 37 traces; see example of a control DNA-linker pulling trace in Fig. S4). We  
18 therefore interpreted stepwise lengthening as partial unfolding of tubulin subunits.

19 The rupture events occurring at forces  $33.8 \pm 1.2$  pN, (mean  $\pm$  SE unless otherwise  
20 noted,  $n = 48$  traces; Fig. 3B points to the left) are primarily due to removing tubulin from  
21 the microtubule lattice, based on the following arguments. First, breaking the covalent  
22 bond between the oligonucleotide and the tubulin protein is expected to require much  
23 higher forces (on the nanonewton scale <sup>37</sup>). Second, the shear force to break the 37-  
24 nucleotide oligoDNA-DNA linker interaction is expected to be  $\sim 60$  pN <sup>38</sup>, much higher than  
25 the measured rupture forces. And third, the force to break the antibody-digoxigenin bond  
26 must be larger than the force required to rupture the surface-tethered DNA bead controls,  
27 which also used the same anti-digoxigenin antibody (Fig. 3B points to the right;  $40.3 \pm$   
28  $1.8$  pN;  $n = 37$  traces). Thus, a great portion of the rupture events observed in the taxol-  
29 microtubule pulling experiments likely correspond to the removal of tubulin by the applied  
30 force.

1 From the distribution of rupture forces (Fig. 3C), we estimated that the force  
2 typically required to remove tubulin from the taxol-stabilized microtubule lattice to be  
3 around 30 pN at this pulling velocity ( $\sim 0.32 \mu\text{m/s}$ ). A complication of our optical trap assay  
4 is the uncertainty of the actual pulling direction with respect to the tubulin being pulled as  
5 we were unable to identify the protofilament on which the subunit was located. The force  
6 required to extract tubulin when pulling in the optimal direction (perhaps orthogonal to the  
7 lattice) is therefore likely to be lower than the rupture forces measured in our optical  
8 tweezer assay.

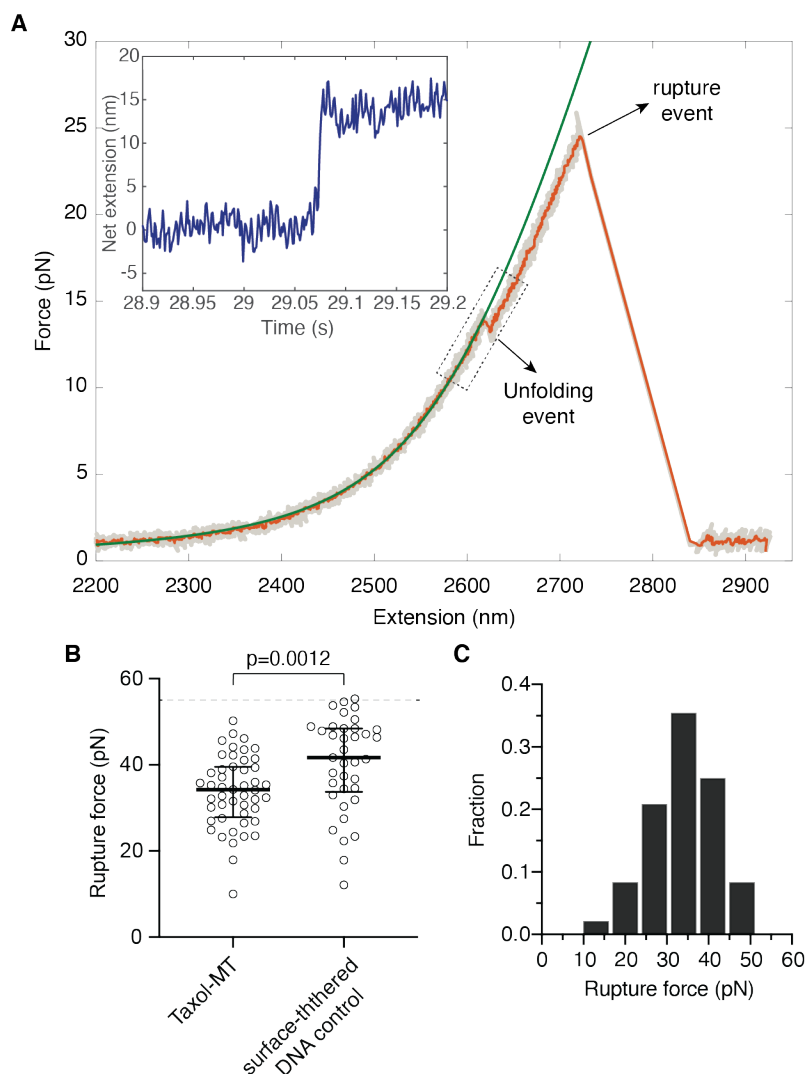

9  
10 **Figure 3. Pulling tubulin subunits from the taxol-stabilized microtubule lattice with an**  
11 **optical trap.** (A) Example of a force-extension curve from the tubulin-pulling assay. Unfolding  
12 and rupture events are indicated by arrows. Experiments were performed with a constant pulling

1 velocity of 0.32  $\mu\text{m/s}$ , using an 8.2 kb-DNA-linker (contour length 2.8  $\mu\text{m}$ ). Gray: raw trace; orange:  
2 median-filtered trace; green: worm-like chain model fit up to the unfolding event. Inset: the  
3 extension after subtracting the extension of DNA linker showed a clear unfolding step of  $\sim 15$  nm.  
4 The corresponding region of the force-extension curve is marked by a rectangle. (B) Rupture  
5 forces from the taxol-MT pulling traces were significantly lower than the ones from the surface-  
6 tethered DNA linker controls ( $p = 0.0012$ , Mann-Whitney  $U$  test). Note that the average rupture  
7 forces measured from the linker-only control were likely to be an underestimation because the  
8 measurements were capped by the maximum force that could be generated by our optical trap  
9 ( $\sim 55$  pN; dashed line in Fig. 3B). (C) Rupture-force histogram in the taxol-stabilized microtubule  
10 pulling experiments.

11

## 12 Unfolding of tubulin subunit under mechanical force

13 To estimate the unfolding step size, we subtracted the length of the DNA linker  
14 estimated by fitting the worm-like chain model (Fig. 3A, green curve). The net extension  
15 showed clear stepwise increases, which we interpret as the partial unfolding of tubulin  
16 (Fig. 3A, inset). The typical step size was 10-20 nm (3% to 92% range) (Fig. 4A),  
17 equivalent to the unfolding of  $\sim 25$ -50 amino acids of the polypeptide ( $\sim 0.4$  nm/residue,  
18 <sup>39</sup>). Examining the secondary structure of  $\alpha$ -tubulin close to the C-terminus <sup>40</sup>, we  
19 hypothesize that these events corresponded to the unfolding of the last C-terminal 2 to 3  
20 helices of  $\alpha$ -tubulin (H11, H11', H12, blue in Fig. 4B); this is consistent with an earlier  
21 coarse-grained molecular simulation of  $\alpha$ -tubulin pulling trajectories <sup>41</sup>.

22 To obtain more detailed kinetic information about the unfolding events, we  
23 transformed the unfolding forces associated with the 10-20 nm step sizes (Fig. 4C) into  
24 the force-dependent lifetime of the folded state  $\tau(F)$  (Fig. 4D) using the method of <sup>42</sup>.  
25 Though the pulling axis in our optical trap assay is likely to be a poor reaction coordinate,  
26 the force-dependent lifetime was nevertheless well-described by Bell's model  $\tau(F) =$   
27  $\tau_0 \exp\left(-\frac{Fx^\ddagger}{k_B T}\right)$  <sup>43</sup>, with the lifetime of the folded state at zero force  $\tau_0 = 25.9 \pm 1.6$  (s) and  
28 the distance to the transition state  $x^\ddagger = 1.05 \pm 0.10$  nm (Fig. 4D). Thus, these results  
29 suggest that the unfolding of the region spanning H11 to H12 of  $\alpha$ -tubulin is an



1 intermediate step in the tubulin-removal pathway, and the spontaneous unfolding of this  
2 region takes place on the timescale of tens of seconds.

3

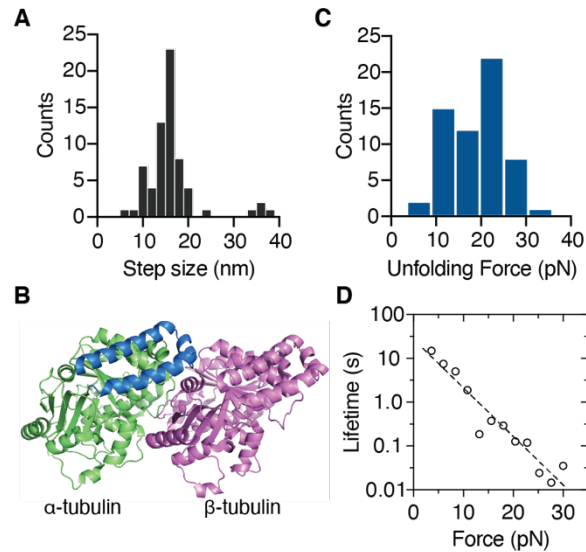

4

5 **Figure 4. Characterization of the unfolding events of tubulin during the microtubule-pulling**  
6 **experiments.** (A) The distribution of the unfolding step sizes ( $16 \pm 6$  nm; mean  $\pm$  SD,  $n = 66$   
7 unfolding events). (B) Structure of  $\alpha\beta$ -tubulin looking at the microtubule surface (PDB: 3J6F, <sup>44</sup>).  
8 The hypothesized unfolding 50 amino acids of  $\alpha$ -tubulin is highlighted in blue (Helix 11, 11', 12).  
9 (C) Distribution of unfolding forces associated with step sizes between 10 to 20 nm ( $19.2 \pm 0.8$   
10 pN; mean  $\pm$  SE,  $n = 60$  events). (D) Lifetime of the folded state  $\tau$  as a function of force  $F$   
11 transformed from the unfolding force histogram in (C) (circles). Fit with the Bell equation (dashed  
12 line):  $\tau_0 = 25.9 \pm 1.6$  s,  $x^\ddagger = 1.05 \pm 0.10$  nm (SE);  $R^2 = 0.92$ .

13

#### 14 Tubulin extraction from GDP-microtubules with molecular motors

15 Because the mean force required to extract tubulin with the optical tweezers (34  
16 pN) is not so different from the force to rupture the DNA-bead tether (41 pN), we sought  
17 an alternative method to measure the tubulin-removal force. In addition, we sought a high-  
18 throughput assay, unlike the tweezer assay in which we can only pull on one tubulin at a  
19 time. We therefore developed a motor-pulling assay in which many force-events can be  
20 measured simultaneously <sup>45</sup>. To this end, we first prepared GDP-microtubules capped  
21 with GMP-CPP tubulin (GMP-CPP is a slowly hydrolysable GTP analogue) to prevent  
22 their spontaneous depolymerization. The GDP-microtubules were prepared by

1 copolymerizing tubulin conjugated to biotinylated DNA linkers (3.8 kb) along with  
2 digoxigenin-labeled tubulin in the presence of GTP, which subsequently hydrolyzes to  
3 GDP (see Materials and Methods for details). These microtubules were bound to the  
4 surface by anti-digoxigenin antibody (Fig. 5A). Biotinylated kinesin-1 (a truncated rat kif5C)  
5 was then joined to the DNA linkers via neutravidin (Fig. 5A). Note that depending on the  
6 concentration, the number of kinesin-1 motors per DNA linker varies from 1 to 3 (there  
7 are four biotin-binding sites per neutravidin tetramer with one used to attach the DNA  
8 linker). We stained the DNA linkers with the fluorescent DNA intercalator SYTOX Green  
9 and visualized it using TIRF microscopy. In the presence of ATP, the DNA linkers, which  
10 formed a compact random coil of diameter  $\sim 0.5 \mu\text{m}$ , were quickly stretched along the  
11 microtubule filament by the kinesins (Fig. 5B,C). The fluorescence intensity of the DNA  
12 linker increased as it approached its contour length due to the tension-dependent  
13 enhancement of affinity to SYTOX green <sup>46,47</sup>. Thus, the stretching of the tubulin-DNA  
14 complexes by the motors could be directly visualized.

15       After the DNA linker was fully stretched, the motors stalled for a variable time until  
16 one of three events occurred. (i) The stretched DNA recoiled to the anchor point and  
17 remained attached to the microtubule (yellow arrowheads in Fig. 5B), presumably  
18 because the motors dissociated from the microtubule lattice. (ii) The stretched DNA  
19 recoiled and was transported along the microtubule filament by the kinesins (double arrow  
20 in Fig. 5B), presumably due to the removal of the GDP-tubulin subunit from the lattice  
21 (Fig. 5B white arrow, 5C). Note that no DNA remained associated with the anchor point  
22 (triple arrow in Fig. 5B). (iii) The stretched DNA separated into two parts, one part recoiling  
23 at the anchor point on the microtubule and the other part recoiling and moving along the  
24 microtubule (see an example in Fig. S5A). This third event we attribute to photocleavage  
25 of the DNA. As further evidence that the motors are actively pulling the entire linker DNA  
26 off the microtubule lattice (presumably with the tubulin attached to it), we quantified the  
27 number of DNA molecules remaining on the microtubules over time by imaging at low  
28 frequency (snapshots with 1 minute interval) to minimize photobleaching. After  
29 introducing biotinylated kinesin-1 and ATP, the number of DNA molecules conjugated to  
30 the microtubules decreased by  $\sim 40\%$  in 5 minutes, while more than 90% of the DNAs

1 remained when the same concentration of non-biotinylated kinesin-1 (and ATP) was used  
2 (Fig. 5D). This decrease was not a result of tension-enhanced photocleavage because  
3 most of the DNA molecules were in the coiled state. This result demonstrates that DNA  
4 is removed by biotinylated motors and not by photocleavage.

5 We measured the time-to-rupture at different concentrations of biotinylated kinesin.  
6 The median rupture time decreased with increasing kinesin concentration and approach  
7 a plateau of  $\sim 8$  s (Fig. 5E). Consistent with this, the rupture-force histogram at saturating  
8 concentrations of biotinylated kinesin (4.5 to 9 nM) was well fit by an exponential with a  
9 decay time of 8.8 s (Fig. S6A). The long attachment time of 8 s is consistent with kinesin  
10 having a catch-like association with the microtubule in which the lifetime of the pulling  
11 state increases with load along the axis of the microtubule <sup>48,49</sup>.

12 To compare the optical-tweezer and motor assays, we transformed the rupture-  
13 force histogram measured in the optical tweezer assay (Fig. 3C) into a force-dependent  
14 bond lifetime using the method of <sup>42</sup>:  $\tau(F) = \tau_0 e^{-F/F_0}$ , where  $\tau_0 = 37$  s is the breakage  
15 time in the absence of force and  $F_0 = 6$  pN is the force that decreases the lifetime e-fold.  
16 The 8-s rupture time measured in the motor assay corresponds to a force of 8.5 pN (Fig.  
17 S6B). This is equivalent to the maximum force generated by 1-2 kinesins (one kinesin  
18 generates 4 to 7 pN, <sup>50</sup>), assuming that the kinesin force is proportional to the number of  
19 motors <sup>49</sup>. Given that we observed stepwise increases of fluorescence even at the highest  
20 motor densities (Figure S5B, C), which we interpret as increasing numbers of motors, not  
21 all three kinesins are bound to the microtubule and generating force during the tubulin  
22 extraction process. Therefore, 1 to 2 kinesins generating an 8.5-pN force that pulls tubulin  
23 out of the lattice in  $\sim 8$  s is reasonable. Thus, we believe there is good qualitative  
24 agreement between the tweezer and motor assays, despite the technical limitations of  
25 our optical tweezer assay (e.g., some ruptures may be due to breaking the antibody-  
26 digoxigenin bond, and the reaction pathway for tubulin extraction may be more complex  
27 than just a single energy barrier) and the details of the experiments differ (e.g., GDP- vs  
28 taxol-stabilized microtubules, and different force vectors relative to the microtubule axis).  
29 In conclusion, our results suggest that the forces generated by 1 to 3 kinesin-1s are able  
30 to extract GDP-tubulin from the lattice in several seconds.

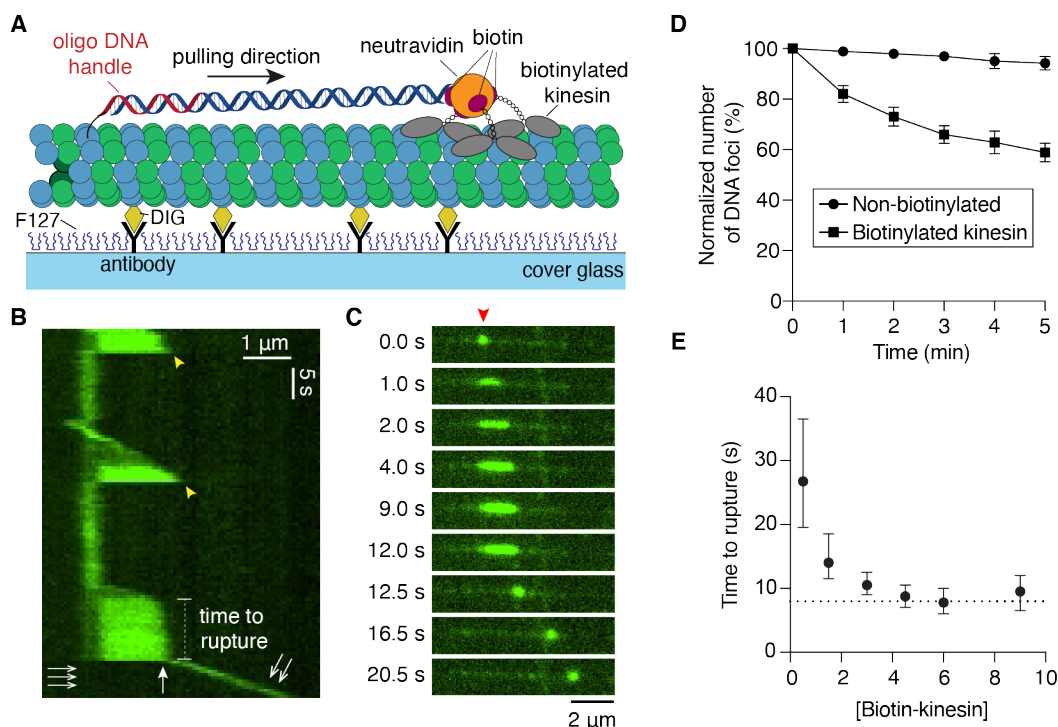

1  
2 **Figure 5. Kinesin-1 pulled out tubulin subunits from the GDP-microtubule lattice.** (A)  
3 Experimental scheme of the motor-pulling assay. GDP-tubulin subunit attached to a DNA linker  
4 (3.8 kb) was pulled by biotinylated kinesin-1 molecules along the microtubule axis. The GDP-  
5 microtubules were stabilized with GMPCPP-tubulin caps on both ends (not shown for simplicity).  
6 (B) Example kymograph of kinesin-1 stretching a DNA-linker (stained by SYTOX Green) and  
7 pulling out a GDP-tubulin subunit. The dissociation event of kinesin-1 is indicated with yellow  
8 arrowheads. The rupture event corresponding to the dissociation of tubulin was marked by the  
9 white arrow. (C) Time-lapse images of the last stretching round before rupture from the  
10 kymograph in (B). The DNA molecule of interest is indicated with a red arrowhead. (D) The  
11 number of microtubule-linked DNA molecules remaining after introducing 6 nM of kinesin-1 (either  
12 non-biotinylated or biotinylated with ~50% stoichiometry) imaged at 1 frame per minute (error bars:  
13 SDs). Biotinylated kinesin-1 led to a significant reduction of fluorescent DNA molecules after 5  
14 minutes as compared to the non-biotinylated kinesin-1 control (Welch *t*-test  $p = 0.0003$ ;  
15 percentage of DNA remained:  $59 \pm 4\%$  vs.  $94 \pm 3\%$ ; mean  $\pm$  SD,  $n = 3$  experiments). (E) Time-  
16 to-rupture (median  $\pm$  95% confidence interval) decreased with increasing concentration of  
17 biotinylated kinesin-1 to a value of  $\sim 8$  s (dashed line). Data collected from triplicate experiments  
18 with  $n = 108, 105, 130, 122, 112, 99$  events at each concentration (from 0.5 nM to 9 nM).  
19

## 1 Discussion

2 Using single-molecule techniques, we have shown that tens of piconewtons of  
3 mechanical force can partially unfold and remove tubulin subunits from the microtubule  
4 lattice on the second timescale. The distribution of rupture forces associated with tubulin  
5 removal measured by optical tweezers is consistent with Bell's equation in which the  
6 lifetime of  $\sim 40$  s at zero force decreases e-fold per 6 pN as the force increases. The  
7 lifetimes measured in the high-throughput motor assays in which one to three kinesins  
8 pull on tubulin are consistent with the optical-tweezer measurements. We now evaluate  
9 the implications of these tubulin-extractions forces on the stability of microtubules and the  
10 mechanism of microtubule severing proteins such as spastin and katanin.

11 Structural studies suggest that AAA unfoldases, such as ClpXP, ClpB, Vps4 and  
12 spastin/katanin, translocate 2 amino acids ( $\sim 0.8$  nm) through their central pores per ATP  
13 hydrolyzed <sup>20,22,24</sup>. If these enzymes are well coupled under load, they could potentially  
14 generate forces as high as 120 pN ( $\Delta G_{\text{ATP}}/0.8$  nm), sufficient to rapidly unfold and remove  
15 tubulin from the microtubule lattice. Indeed, ClpXP <sup>18,19</sup> and ClpB <sup>17</sup> can generate forces  
16 up to 20 and 50 pN respectively, sufficient to partially unfold and extract tubulin. While the  
17 force generated by the microtubule severases remains unknown, our force spectroscopy  
18 of tubulin supports the plausibility of spastin and katanin using an unfoldase-type  
19 mechanism where mechanical force exerted on the tubulin C-terminal tails threads tubulin  
20 through the pore, partially unfolding and then pulling tubulin subunits from the lattice <sup>12,51</sup>.  
21 Whether severing enzymes thread the entire tubulin polypeptide chain through their pore  
22 is less clear: with an ATP hydrolysis rate of  $22 \text{ s}^{-1}$  <sup>52</sup>, threading the full chain would take  
23 spastin about 10 s.

24 The motor pulling assay demonstrated that the forces generated by several  
25 kinesin-1 molecules are sufficient to extract GDP-tubulin from the lattice. Removal of  
26 tubulin from the unstabilized GDP-tubulin lattice did not lead to immediate microtubule  
27 depolymerization (within minutes), however. This suggests that the lattice destruction  
28 observed when dyneins and kinesin-14s walk along microtubules, and when microtubules  
29 glide across surfaces coated with these motors must be due to accumulated damage to  
30 the lattice by several motors <sup>26</sup>. For cellular processes such as mitosis <sup>53</sup> and tissue

1 development<sup>54</sup> that involve frequent sliding of microtubule filaments by multiple motors,  
2 the removal of tubulin under force may create defects on the microtubules and require  
3 the reincorporation of new GTP-tubulin to the lattice to prevent filament breakage<sup>30</sup>.

4         How frequently will a tubulin extraction event occur when a single molecular motor  
5 walks on the microtubule track? We expect a tubulin extraction event to take at least 30  
6 s when the stall force (4 to 7 pN) of a single kinesin is applied (based on the rupture time  
7 measured in the presence of lower concentration of biotinylated kinesin-1, Fig. 5E, 0.5  
8 nM). The time could be much longer if the force spectroscopy probes only the first step in  
9 the extraction pathway, and this step is reversible in the absence of force. The presence  
10 of more than one reversible step prior to tubulin removal likely explains why the tubulin  
11 subunits in a microtubule do not undergo a complete turnover within a minute in the  
12 absence of force as suggested from the Bell's model fit (Fig. S6B, lifetime at zero force  
13 ~40 s). For motors walking without load, the force is expected to be ~1 pN, a lot less than  
14 the stall force<sup>55</sup>, and so the lifetime will be even longer (>1 minute). Given that the kinesin  
15 run-time along the microtubule is ~1 s, we expect that only about 1% of kinesin runs will  
16 result in tubulin removal. Therefore, a large number of the GDP-microtubules are  
17 expected to survive for several minutes before they depolymerize even in the presence  
18 of high motor concentrations<sup>26</sup>.

19         In conclusion, our results provide the first experimental investigation of the  
20 mechanical force required to unfold and extract tubulin from the microtubule lattice.  
21 Several important questions remain to be explored. For instance, how many tubulin  
22 dimers are removed from the microtubule lattice – just one or multiple? Does the partial  
23 unfolding of tubulin weaken tubulin-tubulin bonds, facilitating the dissociation of subunits?  
24 How does the unfolding and rupture force depend on the pulling orientation? Is there a  
25 difference in force requirement when pulled on the C-terminal tail of  $\beta$ -tubulin as  
26 compared to  $\alpha$ -tubulin? We expect our assay design to provide an important step toward  
27 understanding the molecular response of tubulin to mechanical force, with important  
28 implications in the mechanics of the microtubule cytoskeleton and its cellular functions.

29  
30

## 1 **Materials and Methods**

### 2 Protein preparation and assays

3 Bovine brain tubulin was purified in house based on the method described previously <sup>56</sup>.  
4 Codon-optimized human tubulin-tyrosine ligase (TTL) was custom synthesized (IDT) and  
5 cloned into a pET vector with N-terminal His<sub>6</sub>-SUMO tag (Addgene plasmid #29659; a gift  
6 from Scott Gardia, University of California Berkeley) by ligation-independent cloning. His<sub>6</sub>-  
7 SUMO-TTL was expressed in *Escherichia coli* (BL21-DE3 competent cells, Agilent)  
8 overnight at 18 °C in LB broth (induced by 0.5 mM IPTG). The cells were harvested and  
9 stored at -80 °C until purification. To purify His<sub>6</sub>-SUMO-TTL, the cells were resuspended  
10 in cold lysis buffer (20 mM NaH<sub>2</sub>PO<sub>4</sub>, 0.2 M NaCl, 5 mM imidazole, pH 6.9, 0.2 mM  
11 pefabloc, 0.1 mg/mL lysozyme, 1 mM dithiothreitol (DTT), 0.3 U/μL benzonase), and  
12 lysed by sonication on ice. The lysate was clarified by centrifugation and loaded onto a  
13 HisTrap column (GE Healthcare). The column was washed with the imidazole buffer (20  
14 mM NaH<sub>2</sub>PO<sub>4</sub>, 0.2 M NaCl, 20 mM imidazole, pH 6.9, 1 mM DTT). The protein was then  
15 eluted with a continuous gradient (20 mM to 500 mM imidazole). The eluted protein was  
16 concentrated by centrifugal filters (30 kD cutoff) and further purified by size exclusion  
17 chromatography (SEC). The protein was eluted from size exclusion column with SEC  
18 buffer (20 mM MES-KOH, 0.1 M KCl, 10 mM MgCl<sub>2</sub>, 1 mM EGTA, 1 mM DTT, pH 6.9).  
19 The purified protein was concentrated with centrifugal filters, aliquoted, flash frozen with  
20 liquid nitrogen and stored at -80 °C.

21 To test the tyrosination activity of recombinant TTL, 1 μM of purified His<sub>6</sub>-SUMO-  
22 TTL was incubated with 10 μM of bovine tubulin in the presence of 2.5 mM ATP, 1 mM  
23 L-tyrosine and 5 mM DTT in BRB80 (80 mM PIPES-KOH, 1 mM EGTA, 1 mM MgCl<sub>2</sub>, pH  
24 6.9) at 37 °C. A negative control without tyrosinated tubulin was prepared by treating 3  
25 mg/mL bovine tubulin with 0.02 mg/mL carboxypeptidase A (CPA, Sigma Aldrich) on ice  
26 for 15 min to proteolytically cleaved the C-terminal tyrosine of α-tubulin. The tyrosinated  
27 tubulin level was detected by western blot using monoclonal anti-tyrosinated tubulin  
28 antibody (clone YL1/2; 1:2500 dilution; EMD Millipore) as primary antibody and a goat  
29 anti-rat secondary antibody (alkaline phosphatase-conjugated, 1:1500; Invitrogen).

1 For the motor-pulling assay, we used a truncated rat kinesin-1 (the first 430 aa of  
2 rat Kif5C, here denoted as rk430)<sup>57</sup> fused with a mScarlet-SNAP-His<sub>6</sub> tag at the C-  
3 terminus. The expression of rk430-mScarlet-SNAP-His<sub>6</sub> was performed in the same way  
4 as TTL as described earlier. The cell pellet was resuspended in cold lysis buffer (30 mM  
5 HEPES-NaOH pH 7.4, 10 mM imidazole, 0.3 M NaCl, 1 mM DTT, 10 μM ATP) containing  
6 protease inhibitor (Roche) and 0.3 mg/mL lysozyme. The cells were then lysed by  
7 sonication and clarified as earlier described. The clarified lysate was flowed through a  
8 HisTrap column and eluted with a gradient of imidazole (from 10 to 500 mM). The peak  
9 fractions were collected, desalted with Zeba desalting column (ThermoFisher) into anion-  
10 exchange buffer (30 mM HEPES-NaOH pH 7.4, 1 mM DTT, 10 μM ATP) and bound to a  
11 HiTrapQ column (GE Healthcare). The proteins were eluted with a NaCl gradient (0.01 to  
12 1 M). The peak fractions were collected, concentrated using an Amicon centrifugal filter  
13 and purified further with SEC, eluting with BRB80 containing 10 μM ATP and 0.1% β-  
14 mercaptoethanol. The purified protein was flash frozen with liquid nitrogen as small  
15 aliquots and stored at -80 °C. The activity of purified kinesin was confirmed by the single-  
16 molecule fluorescence stepping assay as previously described<sup>58</sup>.

17

#### 18 Site-specific labeling by tubulin-tyrosine ligase (TTL)

19 To introduce the bio-orthogonal azide functional group, bovine brain tubulin was mixed  
20 with His<sub>6</sub>-SUMO-TTL (5:1 molar ratio of tubulin: TTL) in the presence of 1 mM 3-azido-  
21 tyrosine (Watanabe Chemical), 2.5 mM MgATP in BRB80 and incubated at 37 °C for 45  
22 to 60 minutes. To remove TTL and excess azido-tyrosine, the labeled tubulin was  
23 polymerized into microtubules by adding GTP (final concentration 1 mM), glycerol (final  
24 concentration 33.3%) and MgCl<sub>2</sub> (final concentration 3.5 mM) at 37 °C for 30 min. The  
25 microtubule solution was layered on a glycerol cushion (BRB80 with 4 mM MgCl<sub>2</sub>, 1 mM  
26 GTP, 60% glycerol) and centrifuged (340,000 x g, 35 min at 35 °C). The pellet was  
27 resuspended in warm click-labeling buffer (BRB80, 1 mM GTP, 4 mM MgCl<sub>2</sub>, 40%  
28 glycerol), followed by the addition of oligo-DNA or small molecules conjugated to  
29 dibenzocyclooctyne (DBCO) (~0.5 mM final concentration for organic fluorophores  
30 (ThermoFisher) or biotin with PEG<sub>4</sub> linker (Sigma Aldrich); or ~0.15 mM oligo DNA: 5'-



1 TGGACTGATGCGGTATCTGCGATATCCTACGCAGGCGTTT-3'-DBCO (synthesized  
2 from IDT). The copper-free click reaction took place at 37 °C for 1 hour with gentle shake  
3 and occasional mixing. The labeled microtubules were then again layered on the 60%  
4 glycerol cushion and centrifuged at 35 °C (446,000 x g, 20 min) to remove the unreacted  
5 labeling reagent. The microtubules were resuspended with BRB80 and incubated on ice  
6 for 30 min to induce depolymerization. The solution was centrifuged at 4 °C (285,500 x g,  
7 10 min) to remove aggregates or precipitates. An additional polymerization and  
8 depolymerization cycle was used to further purify functional tubulin based on a previous  
9 protocol <sup>59</sup>. The labeled tubulin was flash frozen in liquid nitrogen and stored at -80 °C.  
10 The concentration of tubulin and labeling density of fluorophores was determined by UV-  
11 Vis absorption. Biotinylation level was quantified using a biotin quantification kit  
12 (ThermoFisher). The oligo-DNA labeling density was estimated by measuring the band  
13 intensities from SDS-PAGE. Note that we chose copper-free click chemistry due to the  
14 commercial availability of azido-tyrosine and its faster reaction kinetic without the need of  
15 catalyst as compared to the hydrazone formation strategy used in <sup>32</sup>.

16 To confirm the labeling specificity, high-resolution SDS-PAGE was used to  
17 separate  $\alpha$ - and  $\beta$ -tubulin as previously described <sup>60</sup>. To examine the specific labeling site,  
18 SSL-biotinylated tubulin was first buffer exchanged into phosphate buffer saline (PBS) pH  
19 7.4. Biotinylated tubulin was then protease digested by AspN (Promega) at 37 °C  
20 overnight (1:50 w/w ratio). An equal volume of BRB80 was added to stop the protease  
21 digestion, and incubated with NeutrAvidin agarose resin (Pierce) for 1 hour at room  
22 temperature to pull down the biotinylated peptides. The resin was washed with PBS and  
23 water, and the biotinylated peptides were eluted by incubating the resin with an aqueous  
24 solution containing 80% acetonitrile, 0.2% trifluoroacetic acid, 0.1% formic acid at 60 °C  
25 for 5 min. The elute was then sent for proteomic analysis. The peptides were separated  
26 using reverse-phase ultra-high pressure liquid chromatography (UPLC) and analyzed by  
27 tandem mass spectrometry (MS/MS) with electrospray ionization. MS/MS spectra were  
28 searched by MASCOT against the bovine  $\alpha$ -tubulin sequence with the modifications  
29 corresponding to the copper-free click biotin adduct on tyrosine and polyglutamylation (up  
30 to 4 glutamate chains) on glutamate side chains. All biotinylated peptide hits

1 corresponded to the C-terminal tail of  $\alpha$ -tubulin, confirming the site-specificity of the  
2 labeling method. Microtubule dynamic assays were used to measure the dynamic  
3 properties of SSL-Alexa Fluor 488-tubulin and unlabeled tubulin (in BRB80 supplemented  
4 with 1 mM GTP and 5 mM DTT) as described previously<sup>61,62</sup> using interference-reflection  
5 microscopy (IRM)<sup>63</sup>.

6

### 7 Microscopy setups

8 The two-color (488 nm and 561 nm excitation lasers) total-internal-reflection-fluorescence  
9 (TIRF) microscopy and interference-reflection microscopy (IRM) was set up on a Nikon  
10 Ti-Eclipse microscope as previously described<sup>63</sup> with a sCMOS camera (Zyla 4.2 Plus,  
11 Andor) for both TIRF and IRM imaging.

12 The home-built optical tweezer setup was constructed around a Zeiss inverted  
13 microscope as previously described<sup>64</sup> with the near infrared 1064 nm Nd:YAG laser (IPG  
14 photonics). The system was coupled to a differential-interference-contrast (DIC)  
15 condenser to visualize microtubule filaments and the polystyrene microspheres using  
16 blue light LED illumination<sup>65</sup>. We used a Zeiss Plan-Neofluar 100x/1.3 NA objective for  
17 both trapping and DIC imaging. The sample stage was controlled by a three-axis  
18 piezoelectric stage with sub-nanometer precision (Physik Instrumente). To detect the  
19 position of the bead with nanometer sensitivity, we used a quadrant photodiode (QPD;  
20 First Sensor) for back-focal-plane detection and calibrated the position detection and trap  
21 stiffness using a combined drag force-power spectral analysis method as described in  
22<sup>64,66</sup>. All optical tweezer experiments were performed at similar trap stiffness ( $\sim 0.28$ - $0.32$   
23 pN/nm) and the time traces were recorded at 1 kHz sampling frequency. The optical  
24 tweezer system was operated by custom-written software using LabView (National  
25 Instruments)<sup>64</sup>.

26

### 27 Preparation of microspheres

28 The carboxylated polystyrene microspheres (0.58  $\mu\text{m}$  diameter; Bangs Laboratory) were  
29 labeled with anti-digoxigenin Fab fragment (Roche) based on a two-step functionalization  
30 method described in<sup>67</sup> with the following modifications. First, we used a 3:1 molar ratio

1 of 2 kDa  $\alpha$ -methoxy- $\omega$ -amino PEG: 3 kDa  $\alpha$ -amino- $\omega$ -carboxy PEG (Rapp Polymere) in  
2 the first functionalization step. Second, we used 0.16 mg/mL anti-digoxigenin Fab in  
3 phosphate buffer saline (PBS) pH 7.4 for the antibody conjugation step. The Fab-  
4 conjugated microspheres were sonicated briefly (~15 sec) and incubated with 1 mg/mL  
5 BSA on ice for at least 10 min prior to the optical tweezer experiments to enhance the  
6 bead surface passivation.

7

### 8 Preparation of DNA linkers

9 The long DNA linkers containing a 5' overhang on one end and digoxigenin on the  
10 other end were prepared by PCR<sup>68,69</sup> using Q5 polymerase (NEB). Lambda phage DNA  
11 (Thermofisher) was used as the PCR template. The digoxigenin-labeled primer was  
12 prepared by labeling 0.25 mM oligo containing 3 amino groups (amino groups at the 5'  
13 end and the underlined bases: TCIAAGTGACGGCTGCATACTAACC; synthesized by  
14 IDT) with 66 mM digoxigenin N-hydroxysuccinimide ester (Roche) in 50 mM HEPES-  
15 NaOH, 67% DMSO, pH 8.3 overnight with shaking at room temperature. The labeled  
16 primer was purified by G-25 microspin column (Cytvia) and Monarch DNA purification kit  
17 (NEB). The successful conjugation of three digoxigenin moieties was confirmed by the  
18 shift of the molecular weight using denaturing urea polyacrylamide gel electrophoresis.  
19 The primer with 5'- overhang was custom synthesized (IDT) with the following sequence:  
20 CGCCTGCGTAGGATATCGCAGATACCGCATCAGTCCAXCAACGGTTCGATTGCCTG  
21 ACGGA where the sequence complementary to the oligo handle labeled on tubulin is  
22 underlined and X is the abasic residue (1',2'-dideoxyribose). This primer pair produced  
23 the 8.2 kb DNA linker used for the optical tweezer taxol-stabilized microtubule pulling  
24 assay. For surface-tethered DNA control, the purified 8.2 kb DNA linker was annealed to  
25 the oligo DNA handle with 3'-biotin (5'-TGGACTGATGCGGTATCTGCGATATCCTA  
26 CGCAGGCGTTT-3'-biotin) in PBS at room temperature for 3 hr followed by purification  
27 using Monarch DNA purification kit (NEB).

28 For the motor pulling assay, the digoxigenin-labeled primer was replaced with 5'-  
29 biotinylated primer (IDT). The complete primer pairs and the corresponding product length  
30 is provided in Table S1. The DNA linkers produced by the PCR reaction were first

1 desalted using an amicon centrifugal filter and purified using the PureLink PCR  
2 purification kit (ThermoFisher). DNA linkers were eluted with low TE buffer (10 mM Tris-  
3 HCl, 0.1 mM EDTA, pH 8.0) and stored at -20 °C as small aliquots.

4

#### 5 Taxol-stabilized microtubule pulling assay with optical tweezer

6 To prepare taxol-stabilized microtubules conjugated to DNA linkers, the tubulin-DNA  
7 mixture with 20 μM of tubulin labeled with oligo DNA (labeling density ~3%), 4 μM of  
8 biotinylated tubulin (labeling density ~50%), ~3.4 nM 8.2-kb DNA linker was incubated on  
9 ice for 15 min and polymerized at 37 °C in the presence of 4 mM MgCl<sub>2</sub>, 2% DMSO, 1  
10 mM GTP for 25 min. The polymerized DNA-microtubules were quickly diluted into BRB80  
11 supplemented with 10 μM taxol and pelleted by centrifugation. DNA-microtubules were  
12 then resuspended in BRB80 containing 10 μM taxol.

13 The flow channel was prepared by using one 18x18 and one 22x22 mm<sup>2</sup> Piranha  
14 solution-cleaned and silanized coverslips sandwiching parafilm stripes as previously  
15 described <sup>62,70</sup>. The flow channel was incubated with 0.02 mg/mL biotinylated bovine  
16 serum albumin (BSA) (Sigma Aldrich) solution for 5 min and washed by BRB80. The  
17 channel was then passivated by 3% BSA solution for 30 min and washed with  
18 BRB80+1%Tween20. The chamber was further incubated with 0.05 mg/mL Neutravidin  
19 solution containing 1 mg/mL BSA and 1% Tween20 for 10 min and washed again with  
20 BRB80+1%Tween20. Taxol-stabilized DNA-microtubules were then attached to the  
21 surface under solution flow. Polystyrene beads conjugated with anti-digoxigenin Fab  
22 (~0.01% beads in BRB80 supplemented with 0.1%Tween20, 1 mg/mL BSA and 10 μM  
23 taxol) were then introduced to the chamber and incubated for 30 min at room temperature  
24 to allow the attachment of DNA linkers. The unbound beads were then washed out.  
25 Freshly prepared oxygen scavenger solution [40 mM glucose, 0.04 mg/mL glucose  
26 oxidase (from *Aspergillus niger*; Sigma Aldrich), 0.02 mg/mL catalase (from *Aspergillus*  
27 *niger*; EMD Millipore), 0.2 mg/mL casein, 10 mM DTT, 10 μM taxol, 0.1% Tween 20] was  
28 then introduced into the channel. The channel was then sealed with VALAP (equal ratio  
29 of Vaseline, lanolin and parafilm) for the optical tweezer experiments. Tethered beads  
30 undergoing tethered Brownian motion close to the microtubules (imaged by DIC) were

1 selected for optical trapping and the calibration was performed for each bead. The  
2 tethered bead was trapped at  $\sim 300$  nm away from the surface and the stage was first set  
3 to oscillate with a small amplitude (2.5 to 2.8  $\mu\text{m}$ ) in the lateral direction of the microtubule  
4 at 0.1 to 0.2 Hz. The position of the stage was finely adjusted so that the trap center was  
5 aligned with the anchor point of the linker based on the symmetry of the QPD voltage-  
6 distance traces. The amplitude we used in this process was quite small so that the force  
7 was typically less than 5 pN. To collect the pulling traces, the stage was oscillating with  
8 constant velocity ( $\sim 0.32$   $\mu\text{m}/\text{min}$ ) with an amplitude of 3.2 or 3.3  $\mu\text{m}$  until rupture was  
9 observed (typically within 1 or 2 cycles). More than 95% of the traces showed rupture  
10 events in our experiments. All traces were collected within 60-75 min after the oxygen  
11 scavenger solution was introduced.

12 For the surface-tethered DNA control experiments, 22x22 mm<sup>2</sup> coverslips were  
13 first cleaned by three cycles of sonication in 1 M KOH and ethanol (15 min each) and  
14 dried under nitrogen gas. To covalently functionalize the cleaned coverslips, 40  $\mu\text{L}$  of  
15 biotinylation solution [1 mg/mL of biotin-PEG5000 silane, 100 mg/mL PEG5000-silane  
16 (Nanocs) dissolved in 95% ethanol] was sandwiched by two coverslips and incubated at  
17 room temperature for 2 hr inside a sealed wet chamber. The functionalized coverslips  
18 were then rinsed with water, dried under nitrogen gas and stored. The flow channel was  
19 constructed in the same method as the taxol-microtubule pulling experiments. The  
20 channel was passivated with 3% BSA and washed with BRB80+1%Tween20. To tether  
21 the biotinylated DNA-linker, 10  $\mu\text{g}/\text{mL}$  Neutravidin solution containing 1 mg/mL BSA and  
22 1% Tween 20 was then introduced to the channel followed by another wash of  
23 BRB80+1% Tween 20. The channel was then incubated with 15 pM of biotinylated DNA  
24 linkers for 15 min followed by another wash. The successful hybridization of the DNA  
25 linkers was verified by staining of dsDNA (QuantiFluor, Promega). Bead tethering and  
26 optical tweezer pulling were performed as the taxol-stabilized microtubule pulling assay  
27 described above.

28

29 Analysis of pulling traces

1 To obtain the force-extension curves from the pulling traces, we employed the strategy  
2 described in <sup>35</sup> to identify the anchor point based on the symmetry of pulling traces during  
3 stage oscillation. The extensions were calculated by taking the pulling geometry into  
4 account. Due to the long contour length of the DNA linker, the total force was within ~10%  
5 difference from the force along the pulling direction. An 11-point moving median filter was  
6 applied to the force-extension traces and the traces were fit with the worm-like chain  
7 (WLC) model <sup>35,36</sup>(up to the unfolding steps if they were present). Traces that showed  
8 evident asymmetry during the stage oscillation cycles or deviated significantly from the  
9 predicted DNA force-extension curve were discarded. Rupture forces and unfolding  
10 forces were measured from the sharp decrease of the force from the force-extension  
11 curves and force-time traces. To estimate the unfolding step size, the DNA extension  
12 estimated by the eWLC fit was subtracted from the total extension. The step size was  
13 estimated from the jump of the net extension over time. Limited by the noise, the minimum  
14 step size we could estimate is on the level of ~5 nm. The unfolding force histogram was  
15 converted to the force-dependent folded state lifetime based on the previous work <sup>42</sup>  
16 which included the correction for the force-dependent loading rate resulted from the  
17 compliance of the DNA linkers. All optical tweezer data analysis was performed using  
18 MATLAB software.

19

## 20 Motor pulling assay

21 The flow channel was prepared as aforementioned using 0.01 mg/mL anti-digoxigenin  
22 antibody (Roche) and passivated with 1% F127 and 2 mg/mL casein. To prepare the  
23 GMPCPP-capped microtubule, digoxigenin-labeled GMPCPP seeds were first  
24 polymerized (4  $\mu$ M tubulin, 0.4  $\mu$ M digoxigenin-tubulin, 1 mM MgCl<sub>2</sub>, 1 mM GMPCPP) at  
25 37 °C for 30 min. The GMPCPP seeds were centrifuged and resuspended in BRB80 at a  
26 tubulin concentration of ~4  $\mu$ M (assuming ~70% recovery). The DNA-tubulin mix  
27 containing 20  $\mu$ M of oligo-tubulin (labeling density ~3%), 2  $\mu$ M of digoxigenin-tubulin, ~8  
28 nM 3.8 kb biotinylated DNA linker, 6 mM MgCl<sub>2</sub>, 1.5 mM GTP were incubated on ice for  
29 15 min. The DNA-tubulin mix was then quickly warmed up to 37 °C and mixed with the  
30 GMPCPP-seeds in a 2:1 volume ratio. The microtubules were then polymerized at 37 °C

1 for 25 min and quickly diluted with 10 times volume of BRB80-taxol solution (BRB80  
2 containing 10  $\mu$ M taxol). The taxol-stabilized microtubules were centrifuged and  
3 resuspended in BRB80-taxol to remove any unpolymerized tubulin and DNA molecules.  
4 The microtubules were then introduced into the flow channel; following attachment to the  
5 surface, the channel was washed with BRB80-taxol. To perform the capping, taxol was  
6 quickly washed out by flowing in BRB80 followed by the GMPCPP-tubulin capping mix (4  
7  $\mu$ M of unlabeled tubulin, 0.05 mg/mL neutravidin, 5 mM DTT, 0.5 mM GMPCPP, 0.1%  
8 Tween20, 2 mg/mL casein). The capping was performed at 28 °C for ~5 minutes and the  
9 channel was washed with BRB80 again. This taxol-washout capping strategy allowed us  
10 to bind the GDP-microtubule segment to the surface and ensure that all DNA-tubulin  
11 subunits contained GDP rather than GMPCPP. Note that these microtubules should be  
12 free of taxol during the motor pulling experiments because the mean unbinding time of  
13 taxol is less than 10 s<sup>71</sup>, and we also observed occasional shrinkage of GDP-  
14 microtubules during the course of our experiments.

15 To prepare biotinylated kinesin, rk430-mScarlet-SNAP (7  $\mu$ M monomer) was  
16 incubated with benzylguanine-biotin (NEB) in a 4 to 1 molar ratio at room temperature for  
17 15 minutes, which we found to be sufficient for complete reaction. This labeling ratio  
18 reduced the probability that a single kinesin dimer was labeled with two biotin moieties  
19 and only half of the kinesin dimers contained biotin (i.e. 50% labeling density). The  
20 biotinylated kinesin was stored on ice until the microscopy experiments. To visualize and  
21 stretch the DNA-linkers conjugated to GDP-microtubules, various concentrations of  
22 biotinylated kinesin were added into the oxygen scavenger solution containing ATP and  
23 SYTOX-Green (40 mM glucose, 0.04 mg/mL glucose oxidase, 0.02 mg/mL catalase, 0.2  
24 mg/mL casein, 10 mM DTT, 2 mM Trolox, 0.1% Tween 20, 1 mM ATP, 40 nM SYTOX-  
25 Green) and flowed into the flow channel. The DNA molecules were then immediately  
26 visualized by TIRF microscopy with a 0.5 s time interval (or 1 min/frame for the  
27 photodamage controls). All experiments were performed at 28 °C.

28 All analyses of the motor pulling assay were performed by using Fiji<sup>72</sup>. Rupture  
29 time was measured from kymographs. A sharp decrease of stretching velocity typically  
30 occurred when the DNA linkers were fully stretched. The rupture time was determined as

1 the time from this velocity transition (with verification by checking whether the DNA was  
2 stretched close to its contour length) until the rupture events that corresponded to the  
3 removal of GDP-tubulin. Traces that showed clear photocleavage events were excluded  
4 from the rupture time measurement.

5

## 6 **Author contribution**

7 Y.-W.K., M.M. and J.H. conceived the project; Y.-W.K. performed all experiments and  
8 data analysis with the assistance of M.M. and J.H.; preliminary data was collected by Y.-  
9 W. K. and M.M.; M.M., Y.-W.K. and Y.T. set up the optical tweezer instrument; Y.-W.K.  
10 and J.H. wrote the paper with the input of all authors.

11

## 12 **Acknowledgement**

13 We thank Dr Veikko Geyer, Dr Maijia Liao and Dr Anna Luchniak for the helpful discussion.  
14 We thank Dr Ziad Ganim, Dr Ya-Na Chen and Dr Nandan Pandit for their help in the  
15 development of optical tweezer assay, and the Yale Keck Proteomics Center for the mass  
16 spectrometry analysis. We thank Dr Tom Pollard, Dr Enrique De La Cruz and Dr Yongli  
17 Zhang for the feedback on the work. Y.T. acknowledges the support of the Alexander von  
18 Humboldt Foundation through the Feodor Lynen Research Fellowship. This work was  
19 supported by NIH Grant R01 GM139337 (to J.H.).

20

## 21 **Data Availability Statement**

22 The data and code that support the findings of this study are available from the  
23 corresponding author upon request.

24

## 25 **References**

- 26 1. Pollard, T. D., Earnshaw, W. C., Lippincott-Schwartz, J. & Johnson, G. T. *Cell Biology:*  
27 *Third Edition. Cell Biology: Third Edition* (2016).
- 28 2. Cleary, J. M. & Hancock, W. O. Molecular mechanisms underlying microtubule  
29 growth dynamics. *Curr. Biol.* **31**, R560–R573 (2021).
- 30 3. Goodson, H. V & Jonasson, E. M. Microtubules and Microtubule-Associated Proteins.  
31 *Cold Spring Harb. Perspect. Biol.* **10**, a022608 (2018).
- 32 4. Muroyama, A. & Lechler, T. Microtubule organization, dynamics and functions in



- 1 differentiated cells. *Development* **144**, 3012–3021 (2017).
- 2 5. Akhmanova, A. & Steinmetz, M. O. Control of microtubule organization and dynamics:  
3 two ends in the limelight. *Nat. Rev. Mol. cell Biol.* **16**, 711–726 (2015).
- 4 6. McNally, F. J. & Vale, R. D. Identification of katanin, an ATPase that severs and  
5 disassembles stable microtubules. *Cell* **75**, 419–429 (1993).
- 6 7. Lindeboom, J. J. *et al.* CLASP stabilization of plus ends created by severing promotes  
7 microtubule creation and reorientation. *J. Cell Biol.* **127**, jcb.201805047 (2018).
- 8 8. Fan, Y. & Burkart, G. M. The Arabidopsis SPIRAL2 Protein Targets and Stabilizes  
9 Microtubule Minus Ends. *Curr. Biol.* **28**, 987-994.e3 (2018).
- 10 9. Kuo, Y., Trottier, O. & Howard, J. Predicted Effects of Severing Enzymes on the  
11 Length Distribution and Total Mass of Microtubules. *Biophys. J.* **117**, 2066–2078  
12 (2019).
- 13 10. Loughlin, R., Wilbur, J. D., McNally, F. J., Nédélec, F. J. & Heald, R. Katanin  
14 contributes to interspecies spindle length scaling in *Xenopus*. *Cell* **147**, 1397–1407  
15 (2011).
- 16 11. Saltini, M. & Mulder, B. M. Critical threshold for microtubule amplification through  
17 templated severing. *Phys. Rev. E* **101**, 52405 (2020).
- 18 12. Kuo, Y. W. & Howard, J. Cutting, Amplifying, and Aligning Microtubules with Severing  
19 Enzymes. *Trends Cell Biol.* **31**, 50–61 (2021).
- 20 13. McNally, F. J. & Roll-Mecak, A. Microtubule-severing enzymes: From cellular  
21 functions to molecular mechanism. *J. Cell Biol.* **217**, 4057–4069 (2018).
- 22 14. Sharp, D. J. & Ross, J. L. Microtubule-severing enzymes at the cutting edge. *J. Cell*  
23 *Sci.* **125**, 2561–2569 (2012).
- 24 15. Roll-Mecak, A. & Vale, R. D. Structural basis of microtubule severing by the  
25 hereditary spastic paraplegia protein spastin. *Nature* **451**, 363–367 (2008).
- 26 16. Gates, S. N. *et al.* Ratchet-like polypeptide translocation mechanism of the AAA+  
27 disaggregase Hsp104. *Science (80-. )*. **357**, 273–279 (2017).
- 28 17. Avellaneda, M. J. *et al.* Processive extrusion of polypeptide loops by a Hsp100  
29 disaggregase. *Nat. 2020 5787794* **578**, 317–320 (2020).
- 30 18. Aubin-Tam, M.-E., Olivares, A. O., Sauer, R. T., Baker, T. A. & Lang, M. J. Single-

- 1 molecule protein unfolding and translocation by an ATP-fueled proteolytic machine.  
2 *Cell* **145**, 257–267 (2011).
- 3 19. Maillard, R. A. *et al.* ClpX(P) generates mechanical force to unfold and translocate its  
4 protein substrates. *Cell* **145**, 459–469 (2011).
- 5 20. Monroe, N., Han, H., Shen, P. S., Sundquist, W. I. & Hill, C. P. Structural basis of  
6 protein translocation by the Vps4-Vta1 AAA ATPase. *Elife* **6**, e24487 (2017).
- 7 21. Schöneberg, J. *et al.* ATP-dependent force generation and membrane scission by  
8 ESCRT-III and Vps4. *Science* **362**, 1423–1428 (2018).
- 9 22. Puchades, C., Sandate, C. R. & Lander, G. C. The molecular principles governing  
10 the activity and functional diversity of AAA+ proteins. *Nat. Rev. Mol. Cell Biol.* **21**, 43–  
11 58 (2019).
- 12 23. Sandate, C. R., Szyk, A., Zehr, E. A., Lander, G. C. & Roll-Mecak, A. An allosteric  
13 network in spastin couples multiple activities required for microtubule severing. *Nat.*  
14 *Struct. Mol. Biol.* **26**, 671–678 (2019).
- 15 24. Han, H. *et al.* Structure of spastin bound to a glutamate-rich peptide implies a hand-  
16 over-hand mechanism of substrate translocation. *J. Biol. Chem.* **295**, 435–443 (2019).
- 17 25. Zehr, E. A., Szyk, A., Szczesna, E. & Roll-Mecak, A. Katanin Grips the  $\beta$ -Tubulin Tail  
18 through an Electropositive Double Spiral to Sever Microtubules. *Dev. Cell* **52**, 118--  
19 131.e6 (2020).
- 20 26. Triclin, S. *et al.* Self-repair protects microtubules from destruction by molecular  
21 motors. *Nat. Mater.* 2021 206 **20**, 883–891 (2021).
- 22 27. Budaitis, B. G. *et al.* A kinesin-1 variant reveals motor-induced microtubule damage  
23 in cells. *bioRxiv* 2021.10.19.464974 (2021) doi:10.1101/2021.10.19.464974.
- 24 28. Andreu-Carbó, M., Fernandes, S., Velluz, M. C., Kruse, K. & Aumeier, C. Motor usage  
25 imprints microtubule stability along the shaft. *Dev. Cell* **57**, 5-18.e8 (2022).
- 26 29. Walczak, C. E., Gayek, S. & Ohi, R. Microtubule-Depolymerizing Kinesins.  
27 <http://dx.doi.org/10.1146/annurev-cellbio-101512-122345> **29**, 417–441 (2013).
- 28 30. Schaedel, L. *et al.* Microtubules self-repair in response to mechanical stress. *Nat.*  
29 *Mater.* 2015 1411 **14**, 1156–1163 (2015).
- 30 31. Cross, R. A. Microtubule lattice plasticity. *Curr. Opin. Cell Biol.* **56**, 88–93 (2019).

- 1 32. Banerjee, A. *et al.* Site-specific orthogonal labeling of the carboxy terminus of alpha-  
2 tubulin. *ACS Chem. Biol.* **5**, 777–785 (2010).
- 3 33. Schumacher, D. *et al.* Versatile and Efficient Site-Specific Protein Functionalization  
4 by Tubulin Tyrosine Ligase. *Angew. Chemie - Int. Ed.* (2015)  
5 doi:10.1002/anie.201505456.
- 6 34. Schafer, D. A., Gelles, J., Sheetz, M. P. & Landick, R. Transcription by single  
7 molecules of RNA polymerase observed by light microscopy. *Nat.* **1991** 3526334 **352**,  
8 444–448 (1991).
- 9 35. Wang, M. D., Yin, H., Landick, R., Gelles, J. & Block, S. M. Stretching DNA with  
10 optical tweezers. *Biophys. J.* **72**, 1335 (1997).
- 11 36. Marko, J. F. & Siggia, E. D. Stretching DNA. *Macromolecules* **28**, 8759–8770 (1995).
- 12 37. Grandbois, M., Beyer, M., Rief, M., Clausen-Schaumann, H. & Gaub, H. E. How  
13 strong is a covalent bond. *Science (80-. )*. **283**, 1727–1730 (1999).
- 14 38. Hatch, K., Danilowicz, C., Coljee, V. & Prentiss, M. Demonstration that the shear  
15 force required to separate short double-stranded DNA does not increase significantly  
16 with sequence length for sequences longer than 25 base pairs. *Phys. Rev. E - Stat.*  
17 *Nonlinear, Soft Matter Phys.* **78**, 011920 (2008).
- 18 39. Ainaravapu, S. R. K. *et al.* Contour Length and Refolding Rate of a Small Protein  
19 Controlled by Engineered Disulfide Bonds. *Biophys. J.* **92**, 225–233 (2007).
- 20 40. Löwe, J., Li, H., Downing, K. H. & Nogales, E. Refined structure of  $\alpha\beta$ -tubulin at 3.5  
21 Å resolution. *J. Mol. Biol.* **313**, 1045–1057 (2001).
- 22 41. Varikoti, R. A., Macke, A. C., Speck, V., Ross, J. L. & Dima, R. I. Molecular  
23 investigations into the unfoldase action of severing enzymes on microtubules.  
24 *Cytoskeleton* **77**, 214–228 (2020).
- 25 42. Dudko, O. K., Hummer, G. & Szabo, A. Theory, analysis, and interpretation of single-  
26 molecule force spectroscopy experiments. *Proc. Natl. Acad. Sci. U. S. A.* **105**,  
27 15755–15760 (2008).
- 28 43. Bell, G. I. Models for the Specific Adhesion of Cells to Cells. *Science (80-. )*. **200**,  
29 618–627 (1978).
- 30 44. Alushin, G. M. *et al.* High-Resolution microtubule structures reveal the structural

- 1 transitions in  $\alpha\beta$ -tubulin upon GTP hydrolysis. *Cell* **157**, 1117–1129 (2014).
- 2 45. Urbanska, M. *et al.* Highly-Parallel Microfluidics-Based Force Spectroscopy on Single  
3 Cytoskeletal Motors. *Small* **17**, 2007388 (2021).
- 4 46. Vladescu, I. D., McCauley, M. J., Nuñez, M. E., Rouzina, I. & Williams, M. C.  
5 Quantifying force-dependent and zero-force DNA intercalation by single-molecule  
6 stretching. *Nat. Methods* **2007 46 4**, 517–522 (2007).
- 7 47. Biebricher, A. S. *et al.* The impact of DNA intercalators on DNA and DNA-processing  
8 enzymes elucidated through force-dependent binding kinetics. *Nat. Commun.* **2015**  
9 **6**, 1–12 (2015).
- 10 48. Pырpassopoulos, S., Shuman, H. & Ostap, E. M. Modulation of Kinesin’s Load-  
11 Bearing Capacity by Force Geometry and the Microtubule Track. *Biophys. J.* **118**,  
12 243–253 (2020).
- 13 49. Khataee, H. & Howard, J. Force Generated by Two Kinesin Motors Depends on the  
14 Load Direction and Intermolecular Coupling. *Phys. Rev. Lett.* **122**, 188101 (2019).
- 15 50. Howard, J. *Mechanics of Motor Proteins and the Cytoskeleton*. (Sinauer Associates  
16 Incorporated, 2001).
- 17 51. Bailey, M. E., Jiang, N., Dima, R. I. & Ross, J. L. Invited review: Microtubule severing  
18 enzymes couple atpase activity with tubulin GTPase spring loading. *Biopolymers* **105**,  
19 547–556 (2016).
- 20 52. Eckert, T. *et al.* Subunit Interactions and Cooperativity in the Microtubule-severing  
21 AAA ATPase Spastin. *J. Biol. Chem.* **287**, 26278–26290 (2012).
- 22 53. Forth, S. & Kapoor, T. M. The mechanics of microtubule networks in cell division. *J.*  
23 *Cell Biol.* **216**, 1525–1531 (2017).
- 24 54. Lu, W. & Gelfand, V. I. Moonlighting Motors: Kinesin, Dynein, and Cell Polarity.  
25 *Trends Cell Biol.* **27**, 505–514 (2017).
- 26 55. Bormuth, V., Varga, V., Howard, J. & Schäffer, E. Protein friction limits diffusive and  
27 directed movements of kinesin motors on microtubules. *Science* **325**, 870–873  
28 (2009).
- 29 56. Castoldi, M. & Popov, A. V. Purification of brain tubulin through two cycles of  
30 polymerization-depolymerization in a high-molarity buffer. *Protein Expr. Purif.* **32**, 83–

- 1 88 (2003).
- 2 57. Rogers, K. R. *et al.* KIF1d is a fast non-processive kinesin that demonstrates novel  
3 K-loop-dependent mechanochemistry. *EMBO J.* (2001)  
4 doi:10.1093/emboj/20.18.5101.
- 5 58. Korten, T. *et al.* Fluorescence imaging of single kinesin motors on immobilized  
6 microtubules. *Methods Mol. Biol.* (2011) doi:10.1007/978-1-61779-282-3\_7.
- 7 59. Hyman, A. *et al.* Preparation of modified tubulins. *Methods Enzymol.* **196**, 478–485  
8 (1991).
- 9 60. Banerjee, A., Bovenzi, F. A. & Bane, S. L. High-resolution separation of tubulin  
10 monomers on polyacrylamide minigels. *Anal. Biochem.* (2010)  
11 doi:10.1016/j.ab.2010.03.035.
- 12 61. Kuo, Y.-W., Trottier, O., Mahamdeh, M. & Howard, J. Spastin is a dual-function  
13 enzyme that severs microtubules and promotes their regrowth to increase the  
14 number and mass of microtubules. *Proc. Natl. Acad. Sci.* **116**, 5533–5541 (2019).
- 15 62. Kuo, Y. & Howard, J. In vitro reconstitution of microtubule dynamics and severing  
16 imaged by label-free interference reflection microscopy. *arXiv Prepr.*  
17 *arXiv2107.01501* (2021).
- 18 63. Mahamdeh, M., Simmert, S., Luchniak, A., Schäffer, E. & Howard, J. Label-free high-  
19 speed wide-field imaging of single microtubules using interference reflection  
20 microscopy. *J. Microsc.* **1991**, 95 (2018).
- 21 64. Schäffer, E., Nørrelykke, S. F. & Howard, J. Surface forces and drag coefficients of  
22 microspheres near a plane surface measured with optical tweezers. *Langmuir* **23**,  
23 3654–3665 (2007).
- 24 65. Bormuth, V., Howard, J. & Schäffer, E. LED illumination for video-enhanced DIC  
25 imaging of single microtubules. *J. Microsc.* **226**, 1–5 (2007).
- 26 66. Tolić-Nørrelykke, S. F. *et al.* Calibration of optical tweezers with positional detection  
27 in the back focal plane. *Rev. Sci. Instrum.* **77**, 103101 (2006).
- 28 67. Bugiel, M. *et al.* Versatile microsphere attachment of GFP-labeled motors and other  
29 tagged proteins with preserved functionality. *J. Biol. Methods* **2**, e30 (2015).
- 30 68. Mukhortava, A. & Schlierf, M. Efficient Formation of Site-Specific Protein–DNA

- 1        Hybrids Using Copper-Free Click Chemistry. *Bioconjug. Chem.* **27**, 1559–1563  
2        (2016).
- 3    69. Jiao, J., Rebane, A. A., Ma, L. & Zhang, Y. Single-Molecule Protein Folding  
4        Experiments Using High-Precision Optical Tweezers. in vol. 1486 357–390 (Humana  
5        Press, 2016).
- 6    70. Gell, C. *et al.* Microtubule dynamics reconstituted in vitro and imaged by single-  
7        molecule fluorescence microscopy. *Methods Cell Biol.* **95**, 221–245 (2010).
- 8    71. Fernando Díaz, J., Barasoain, I. & Andreu, J. M. Fast Kinetics of Taxol Binding to  
9        Microtubules EFFECTS OF SOLUTION VARIABLES AND MICROTUBULE-  
10        ASSOCIATED PROTEINS\*. (2002) doi:10.1074/jbc.M211163200.
- 11    72. Schindelin, J. *et al.* Fiji: an open-source platform for biological-image analysis. *Nat.*  
12        *Methods* **9**, 676–682 (2012).
- 13
